# Supplementary material for: ORF Ι of Mycovirus SsNSRV-1 is Associated with Debilitating Symptoms of Sclerotinia sclerotiorum
Source: MDPI journal article supplement (doi:10.3390/v12040456), 2020-04-17
Supplement: s1 [file s1]

**Table S2** Summary of sequencing data

| <b>Sample Name</b> | <b>Clean Reads</b> | <b>Clean bases</b> | <b>Clean bases (GB)</b> | <b>Map quality (%)</b> | <b>Q30 (%)</b> | <b>Q20 (%)</b> | <b>GC (%)</b> | <b>Sequencing Depth (X)</b> |
|--------------------|--------------------|--------------------|-------------------------|------------------------|----------------|----------------|---------------|-----------------------------|
| Z1-1-1             | 41,396,834         | 6,209,525,100      | 6.21                    | 95.59                  | 92.99%         | 97.31%         | 46.64%        | 161                         |
| Z1-1-2             | 41,032,438         | 6,154,865,700      | 6.15                    | 95.80                  | 93.07%         | 97.34%         | 46.61%        | 160                         |
| Z1-1-3             | 41,570,024         | 6,235,503,600      | 6.24                    | 96.02                  | 92.96%         | 97.29%         | 46.61%        | 162                         |
| Z1-13-1            | 41,287,986         | 6,193,197,900      | 6.19                    | 97.04                  | 92.96%         | 97.29%         | 46.43%        | 161                         |
| Z1-13-2            | 41,847,698         | 6,277,154,700      | 6.28                    | 97.25                  | 93.22%         | 97.40%         | 46.39%        | 163                         |
| Z1-13-3            | 40,812,668         | 6,121,900,200      | 6.12                    | 97.86                  | 92.83%         | 97.22%         | 46.22%        | 159                         |
| 1980-1             | 41,574,046         | 6,236,106,900      | 6.24                    | 98.07                  | 93.79%         | 97.61%         | 46.33%        | 162                         |
| 1980-2             | 41,688,260         | 6,253,239,000      | 6.25                    | 97.15                  | 93.80%         | 97.62%         | 46.47%        | 163                         |

|        |            |               |      |       |        |        |        |     |
|--------|------------|---------------|------|-------|--------|--------|--------|-----|
| 1980-3 | 42,077,430 | 6,311,614,500 | 6.31 | 97.59 | 93.57% | 97.52% | 46.54% | 164 |
| AH98-1 | 41,910,418 | 6,286,562,700 | 6.29 | 96.11 | 93.97% | 97.70% | 46.57% | 163 |
| AH98-2 | 41,119,348 | 6,167,902,200 | 6.17 | 97.09 | 93.97% | 97.72% | 46.70% | 160 |
| AH98-3 | 40,973,600 | 6,146,040,000 | 6.15 | 97.00 | 93.84% | 97.66% | 46.66% | 160 |

---

Z1-1-1, Z1-1-2 and Z1-1-3: Three technical replicates of mutant strain Z1-1 expressing *ORF I*. Z1-13-1, Z1-13-2 and Z1-13-3: Three technical replicates of another mutant strain Z1-13 expressing *ORF I*. 1980-1, 1980-2 and 1980-3: Three technical replicates of wild-type strain 1980. AH98-1, AH98-2, AH98-3: Three technical replicates of hypovirulent strain AH98. Map quality: Genome mapping reads/clean reads. Q30 (%): Percentages of clean bases whose correct base recognition rates are greater than 99.9% in total bases. Q20 (%): Percentages of clean bases whose correct base recognition rates are greater than 99% in total bases. Sequencing depth: Clean bases/genome size.
