# Supplementary material for: ORF Ι of Mycovirus SsNSRV-1 is Associated with Debilitating Symptoms of Sclerotinia sclerotiorum
Source: MDPI journal article supplement (doi:10.3390/v12040456), 2020-04-17
Supplement: s1 [file s1]

**Table S1** Primers used in this study

| Primer Name | Sequences (5'-3')                 |
|-------------|-----------------------------------|
| ORF1F       | GGGGTACCATGAGCACAACTGTTGACATTAAGA |
| ORF1R       | GGGGTACCCTACTTTCTGAGATGCTTCGGAAGC |
| QRT-ORF1F   | GCCACTCGTCTGTGTCCCT               |
| QRT-ORF1R   | GTTGAGTTAGTAGTGATTTTTTTGCA        |
| SsActinF1   | AGCACCAGAGGAGCACCCAGTTT           |
| SsActinR1   | CGTGAAGATTGACTGGCGGTTTG           |
| SSActinF2   | CCAATCAACCCAAAGTCCAACAG           |
| SSActinR2   | CGAGCAATGGCGTGAGGAAGTG            |
| EFTF        | GCAACTCTCCTTCTTCCTTCTTCG          |
| Ptp-R       | CTGGACGACTAAACCAAAATAGCA          |
