# Supplementary material for: ORF Ι of Mycovirus SsNSRV-1 is Associated with Debilitating Symptoms of Sclerotinia sclerotiorum
Source: Viruses. 2020 Apr 17;12(4):456. doi: 10.3390/v12040456 (PMC7232168; doi:10.3390/v12040456)
Supplement: Supplementary file 1 [file viruses-12-00456-s001.zip]

Archive with 5 entries (3 files):
- viruses-766358.suppl zip/
- viruses-766358.suppl zip/Supplementary Files/
- viruses-766358.suppl zip/Supplementary Files/TableS1.pdf
- viruses-766358.suppl zip/Supplementary Files/TableS2.pdf
- viruses-766358.suppl zip/Supplementary Files/TableS3.xlsx
