# Supplementary material for: ORF Ι of Mycovirus SsNSRV-1 is Associated with Debilitating Symptoms of Sclerotinia sclerotiorum
Source: Viruses. 2020 Apr 17;12(4):456. doi: 10.3390/v12040456 (PMC7232168; doi:10.3390/v12040456)
Supplement: Supplementary file 1 [file viruses-12-00456-s001.zip › viruses-766358.suppl zip/Supplementary Files/TableS3.xlsx]

## Sheet: down
Table S3 Significantly differentially expressed genes in transcriptome data
Gene ID	Gene ID	Gene ID	Description	#GOs	GOs
gene5471	sscle_06g053560	SS1G_12605	subtilisin-like protein	13	P:pathogenesis; P:complement activation; F:fibrinogen binding; F:identical protein binding; P:proteolysis; F:carboxylic ester hydrolase activity; F:IgE binding; P:negative regulation of catalytic activity; P:active evasion of host immune response via regulation of host complement system; F:serine-type endopeptidase activity; C:extracellular region; P:elastin catabolic process; C:immunoglobulin co…
gene8553	sscle_11g083650	SS1G_07752	predicted protein	12	P:transcription from RNA polymerase II promoter; F:DNA binding; C:nucleus; F:zinc ion binding; P:regulation of transcription from RNA polymerase II promoter; F:sequence-specific DNA binding RNA polymerase II transcription factor activity; P:regulation of transcription, DNA-dependent; F:metal ion binding; P:transcription, DNA-dependent; F:molecular_function; P:biological_process; C:cellular_compon…
gene11134	sscle_16g109000	SS1G_10286	g protein alpha subunit	10	F:signal transducer activity; F:GTP binding; P:GTP catabolic process; P:adenylate cyclase-activating G-protein coupled receptor signaling pathway; P:sporocarp development involved in sexual reproduction; F:metal ion binding; P:conidium formation; F:G-protein beta/gamma-subunit complex binding; F:G-protein coupled receptor binding; F:GTPase activity
gene11192	sscle_16g109570	SS1G_10366	gata-type sexual development transcription factor	9	P:regulation of transcription, DNA-dependent; P:mating; F:sequence-specific DNA binding transcription factor activity; F:sequence-specific DNA binding; P:fungal-type cell wall organization; P:positive regulation of sexual sporulation resulting in formation of a cellular spore; F:zinc ion binding; C:transcription factor complex; P:regulation of transcription, DNA-dependent
gene8649	sscle_11g084600	SS1G_07634	6-phosphofructo-2-kinase 1	8	P:fructose metabolic process; P:carbohydrate phosphorylation; F:fructose-2,6-bisphosphate 2-phosphatase activity; P:dephosphorylation; F:6-phosphofructo-2-kinase activity; P:fructose 2,6-bisphosphate metabolic process; F:ATP binding; P:mannose metabolic process
gene9568	sscle_13g093600	SS1G_06551	sodium p-type atpase	7	C:integral to membrane; F:metal ion binding; P:ATP catabolic process; F:cation-transporting ATPase activity; F:ATP binding; P:ion transmembrane transport; P:cation transport
gene9656	sscle_13g094450	SS1G_06668	calcium-transporting atpase 2	7	F:metal ion binding; C:integral to membrane; F:calcium-transporting ATPase activity; P:calcium ion transmembrane transport; P:ATP catabolic process; F:ATP binding; C:sarcoplasmic reticulum
gene9742	sscle_13g095280	SS1G_06769	f-box associated region domain-containing protein	7	F:molecular_function; P:biological_process; C:cellular_component; P:oxidation-reduction process; F:oxidoreductase activity; F:oxidoreductase activity, acting on the aldehyde or oxo group of donors, NAD or NADP as acceptor; P:metabolic process
gene3629	sscle_04g035450	SS1G_02554	cdp-alcohol phosphatidyltransferase	6	P:vesicle-mediated transport; C:COPI vesicle coat; P:intracellular protein transport; F:structural molecule activity; F:phosphotransferase activity, for other substituted phosphate groups; P:phospholipid biosynthetic process
gene7844	sscle_10g076670	SS1G_08371	inositol polyphosphate multikinase	6	F:nucleoside-triphosphatase activity; P:mRNA 3'-end processing; F:inositol-1,4,5-trisphosphate 3-kinase activity; F:ATP binding; C:mRNA cleavage factor complex; P:phosphorylation
gene10099	sscle_14g098760	SS1G_08681	homeobox domain-containing protein	6	P:regulation of transcription, DNA-dependent; F:sequence-specific DNA binding transcription factor activity; F:sequence-specific DNA binding; C:nucleus; C:transcription factor complex; P:regulation of transcription, DNA-dependent
gene1373	sscle_02g013360	SS1G_12724	esterase lipase	6	F:molecular_function; P:biological_process; C:cellular_component; F:hydrolase activity; P:metabolic process; F:triglyceride lipase activity
gene2759	sscle_03g027010	SS1G_00451	glycerol kinase	5	F:glycerol kinase activity; P:carbohydrate metabolic process; P:glycerol-3-phosphate metabolic process; P:phosphorylation; P:glycerolipid metabolic process
gene508	sscle_01g004880	SS1G_01941	membrane protein	5	F:hydrolase activity; P:metabolic process; F:molecular_function; P:biological_process; C:cellular_component
gene3495	sscle_04g034200	SS1G_02385	c6 zinc finger domain-containing protein	5	P:regulation of transcription from RNA polymerase II promoter; F:zinc ion binding; F:sequence-specific DNA binding RNA polymerase II transcription factor activity; F:DNA binding; C:nucleus
gene5100	sscle_06g049900	SS1G_07344	meab protein	5	F:sequence-specific DNA binding; F:sequence-specific DNA binding transcription factor activity; P:regulation of transcription, DNA-dependent; C:transcription factor complex; P:regulation of transcription, DNA-dependent
gene5093	sscle_06g049830	SS1G_07355	transcription regulator partial	5	C:cytoplasm; P:regulation of transcription, DNA-dependent; F:metal ion binding; F:DNA binding; C:nucleus
gene7053	sscle_09g068890	SS1G_10918	domain-containing protein	5	F:guanyl-nucleotide exchange factor activity; P:regulation of small GTPase mediated signal transduction; C:intracellular; P:regulation of GTPase activity; F:protein binding
gene8149	sscle_10g079690	SS1G_14108	vacuolar calcium ion transporter	5	P:mycelium development; P:ion transmembrane transport; P:pathogenesis; P:cation transport; C:integral to membrane
gene8735	sscle_11g085430	SS1G_14485	ndt80 like dna-binding family protein	5	F:sequence-specific DNA binding transcription factor activity; P:regulation of transcription, DNA-dependent; F:DNA binding; C:transcription factor complex; P:regulation of transcription, DNA-dependent
gene2935	sscle_03g028700	SS1G_00238	pectate lyase a	4	C:extracellular region; F:pectate lyase activity; F:fibrinogen binding; P:pectin catabolic process
gene3456	sscle_04g033820	SS1G_02334	glycoside hydrolase family 7 protein	4	F:hydrolase activity, hydrolyzing O-glycosyl compounds; F:cellulose binding; P:glucan catabolic process; C:extracellular region
gene5774	sscle_07g056480	SS1G_03455	kinase domain containing protein	4	P:protein phosphorylation; F:ATP binding; F:protein serine/threonine kinase activity; P:serine family amino acid metabolic process
gene1587	sscle_02g015490	SS1G_04606	arsenite efflux transporter - puative	4	P:arsenite transport; C:integral to membrane; F:arsenite transmembrane transporter activity; P:ion transmembrane transport
gene6468	sscle_08g063200	SS1G_04975	isocitrate lyase	4	C:peroxisome; P:tricarboxylic acid cycle; F:isocitrate lyase activity; P:glyoxylate cycle
gene7922	sscle_10g077440	SS1G_08467	sugar transporter family protein	4	C:integral to membrane; P:transmembrane transport; F:transmembrane transporter activity; P:carbohydrate transport
gene1083	sscle_01g010520	SS1G_01210	pap2 domain containing protein	3	P:metabolic process; C:membrane; F:catalytic activity
gene702	sscle_01g006790	SS1G_01696	mfs phosphate transporter	3	P:transmembrane transport; C:integral to membrane; F:transmembrane transporter activity
gene365	sscle_01g003500	SS1G_02107	hypothetical protein SS1G_02107	3	P:mycelium development; F:molecular_function; C:cellular_component
gene7505	sscle_09g073350	SS1G_03795	ribonuclease t2	3	F:RNA binding; F:ribonuclease T2 activity; P:RNA phosphodiester bond hydrolysis, endonucleolytic
gene1800	sscle_02g017560	SS1G_04336	mfs-type transporter	3	P:transmembrane transport; C:integral to membrane; F:transporter activity
gene1693	sscle_02g016500	SS1G_04475	endo alpha-	3	F:molecular_function; P:biological_process; C:cellular_component
gene1426	sscle_02g013890	SS1G_04814	predicted protein	3	F:molecular_function; P:biological_process; C:cellular_component
gene6718	sscle_08g065650	SS1G_05293	choline transport protein	3	C:integral to membrane; F:amino acid transmembrane transporter activity; P:amino acid transmembrane transport
gene6784	sscle_08g066310	SS1G_05376	membrane protein	3	F:molecular_function; P:biological_process; C:cellular_component
gene9851	sscle_13g096370	SS1G_06920	integral membrane protein	3	F:molecular_function; P:biological_process; C:cellular_component
gene321	sscle_01g003170	SS1G_10006	nad dependent epimerase dehydratase family protein	3	P:cellular metabolic process; F:coenzyme binding; F:catalytic activity
gene4114	sscle_04g040220	SS1G_14220	g-protein coupled receptor	3	C:integral to membrane; P:G-protein coupled receptor signaling pathway; F:G-protein coupled receptor activity
gene4111	sscle_04g040190	SS1G_14223	sulfate permease	3	C:integral to membrane; P:sulfate transmembrane transport; F:secondary active sulfate transmembrane transporter activity
gene2304	sscle_03g022500	SS1G_01045	duf1212 domain membrane protein	2	F:molecular_function; P:biological_process
gene979	sscle_01g009500	SS1G_01346	s-adenosyl-l-methionine-dependent methyltransferase	2	P:methylation; F:methyltransferase activity
gene870	sscle_01g008450	SS1G_01494	alpha- -glucanase	2	F:hydrolase activity; P:metabolic process
gene3728	sscle_04g036390	SS1G_02682	glycoside hydrolase family 76 protein	2	F:mannan endo-1,6-alpha-mannosidase activity; P:carbohydrate catabolic process
gene3918	sscle_04g038260	SS1G_02931	mfs multidrug transporter	2	P:transmembrane transport; C:integral to membrane
gene1923	sscle_02g018760	SS1G_04186	glycosyltransferase family 31 protein	2	P:metabolic process; F:transferase activity
gene1818	sscle_02g017730	SS1G_04316	hard surface induced protein	2	F:transferase activity, transferring acyl groups other than amino-acyl groups; P:metabolic process
gene6414	sscle_08g062660	SS1G_04903	smp-30 gluconolaconase lre-like region	2	P:metabolic process; F:hydrolase activity
gene6456	sscle_08g063080	SS1G_04958	peptidase-like protein	2	F:serine-type endopeptidase activity; P:proteolysis
gene6465	sscle_08g063170	SS1G_04969	glycosyltransferase family 2 protein	2	P:metabolic process; F:transferase activity
gene6763	sscle_08g066100	SS1G_05349	adam family of metalloprotease adm-b	2	F:metalloendopeptidase activity; P:proteolysis
gene4861	sscle_05g047540	SS1G_05747	7alpha-cephem-methoxylase p8 chain related protein	2	F:transferase activity; P:mycelium development
gene4804	sscle_05g046970	SS1G_05817	rta1 domain protein	2	P:response to stress; C:integral to membrane
gene4559	sscle_05g044560	SS1G_06142	3-amino-3-carboxypropyl transferase protein	2	P:methylation; F:methyltransferase activity
gene8645	sscle_11g084560	SS1G_07639	acid phosphatase	2	F:hydrolase activity, acting on ester bonds; P:metabolic process
gene7838	sscle_10g076610	SS1G_08366	acetyltransferase protein	2	F:transferase activity; P:metabolic process
gene294	sscle_01g002910	SS1G_09971	developmental regulator flba	2	P:termination of G-protein coupled receptor signaling pathway; P:intracellular signal transduction
gene9195	sscle_12g089930	SS1G_11992	rhamnogalacturonan acetylesterase	2	F:hydrolase activity; P:metabolic process
gene7476	sscle_09g073070	SS1G_03835	c2h2 transcription factor	1	F:metal ion binding
gene1190	sscle_01g011540	SS1G_01084	predicted protein	0	-
gene1189	sscle_01g011530	SS1G_01086	protein	0	-
gene688	sscle_01g006650	SS1G_01711	protein phosphatase type 1 complex subunit hex2 reg1	0	-
gene4054	sscle_04g039620	SS1G_03103	hypothetical protein SS1G_03103	0	-
gene5965	sscle_07g058300	SS1G_03214	predicted protein	0	-
gene7493	sscle_09g073240	SS1G_03813	spx domain-containing protein	0	-
gene2014	sscle_02g019640	SS1G_04079	plasma membrane protein pth11-like protein	0	-
gene1427	sscle_02g013900	SS1G_04810	developmental regulator	0	-
gene6859	sscle_08g067040	SS1G_05477	hypothetical protein SS1G_05477	0	-
gene4750	sscle_05g046450	SS1G_05889	predicted protein	0	-
gene9826	sscle_13g096120	SS1G_06890	predicted protein	0	-
gene5139	sscle_06g050270	SS1G_07300	pak-box p21-rho-binding protein	0	-
gene8389	sscle_11g082030	SS1G_07962	hypothetical protein SS1G_07962	0	-
gene7676	sscle_10g075020	SS1G_08142	cation-transporting atpase 4 protein	0	-
gene10739	sscle_15g105120	SS1G_09426	predicted protein	0	-
gene10704	sscle_15g104770	SS1G_09477	peptidoglycan binding domain containing protein	0	-
gene10682	sscle_15g104570	SS1G_09496	predicted protein	0	-
gene63	sscle_01g000640	SS1G_09688	predicted protein	0	-
gene8993	sscle_12g087950	SS1G_11154	hypothetical protein SS1G_11154	0	-
gene8930	sscle_12g087330	SS1G_11236	nucleotide-binding domain containing protein	0	-
gene8891	sscle_12g086950	SS1G_11290	hypothetical protein SS1G_11290	0	-
gene9289	sscle_12g090840	SS1G_11872	predicted protein	0	-
gene4254	sscle_05g041560	SS1G_12181	hypothetical protein SS1G_12181	0	-
gene7524	sscle_09g073540	SS1G_12437	predicted protein	0	-
gene5565	sscle_06g054470	SS1G_12475	nadp-dependent alcohol dehydrogenase-like protein	0	-
gene5564	sscle_06g054460	SS1G_12476	f-box and wd40 domain protein	0	-
gene1305	sscle_02g012690	SS1G_12808	predicted protein	0	-
gene10492	sscle_15g102680	SS1G_13432	family protein	0	-
gene10941	sscle_15g107110	#N/A
gene4450	sscle_05g043480	#N/A
gene6851	sscle_08g066960	#N/A
gene9549	sscle_13g093420	#N/A

## Sheet: up
Gene ID	Gene ID	Gene ID	Description	#GOs	GOs
gene2344	sscle_03g022890	SS1G_00993	hydroxysteroid dehydrogenase	6	P:steroid biosynthetic process; P:oxidation-reduction process; F:3-beta-hydroxy-delta5-steroid dehydrogenase activity; P:C21-steroid hormone metabolic process; P:androgen metabolic process; P:estrogen metabolic process
gene9056	sscle_12g088560	SS1G_11081	c6 transcription factor	5	P:regulation of transcription from RNA polymerase II promoter; F:zinc ion binding; F:sequence-specific DNA binding RNA polymerase II transcription factor activity; F:DNA binding; C:nucleus
gene6933	sscle_08g067700	SS1G_05567	alpha-arabinofuranosidase ii protein	6	P:regulation of Rab GTPase activity; P:positive regulation of Rab GTPase activity; P:positive regulation of catalytic activity; P:positive regulation of Ras GTPase activity; P:positive regulation of GTPase activity; F:Rab GTPase activator activity
gene10677	sscle_15g104520	SS1G_09501	ankyrin repeat domain-containing protein 42 isoform x6	2	P:regulation of biological process; F:protein binding
gene954	sscle_01g009260	SS1G_01382	pigment biosynthesis protein ayg1	2	P:metabolic process; F:hydrolase activity
gene11066	sscle_16g108320	SS1G_10195	family protein	2	P:biological_process; C:cellular_component
gene8325	sscle_11g081390	SS1G_08042	serine threonine protein kinase	3	F:protein kinase activity; P:protein phosphorylation; F:ATP binding
gene5334	sscle_06g052200	SS1G_07050	ankyrin repeat protein	1	F:protein binding
gene6522	sscle_08g063720	SS1G_05048	gnat family	2	F:N-acetyltransferase activity; P:acyl-carrier-protein biosynthetic process
gene6549	sscle_08g063990	SS1G_05084	cytochrome p450	5	F:heme binding; F:oxidoreductase activity, acting on paired donors, with incorporation or reduction of molecular oxygen; F:monooxygenase activity; F:iron ion binding; P:oxidation-reduction process
gene7418	sscle_09g072500	SS1G_03912	bel1-like homeodomain protein 8 protein	5	F:DNA binding; P:regulation of transcription, DNA-dependent; F:sequence-specific DNA binding; C:nucleus; F:sequence-specific DNA binding transcription factor activity
gene10885	sscle_15g106550	SS1G_09233	hypothetical protein SS1G_09233	1	F:DNA binding
gene4850	sscle_05g047430	SS1G_05768	cysteinyl-trna synthetase	5	F:cysteine-tRNA ligase activity; P:cysteinyl-tRNA aminoacylation; F:ATP binding; C:cytoplasm; P:cysteine metabolic process
gene8323	sscle_11g081370	SS1G_08045	predicted protein	6	F:ATP binding; F:protein kinase activity; P:peptidyl-tyrosine phosphorylation; P:protein phosphorylation; F:protein tyrosine kinase activity; F:transferase activity, transferring phosphorus-containing groups
gene2397	sscle_03g023410	SS1G_00919	major facilitator superfamily transporter	2	C:integral to membrane; P:transmembrane transport
gene4849	sscle_05g047420	SS1G_05770	na(+) h(+) antiporter 2	6	; F:solute:hydrogen antiporter activity; C:integral to membrane; P:cation transport; P:transmembrane transport; P:regulation of pH
gene2943	sscle_03g028780	SS1G_00226	lpxtg-domain-containing protein	0	-
gene2398	sscle_03g023420	SS1G_00917	predicted protein	0	-
gene366	sscle_01g003510	SS1G_02106	predicted protein	0	-
gene3528	sscle_04g034510	SS1G_02419	hypothetical protein SS1G_02419	0	-
gene8335	sscle_11g081490	SS1G_08030	ligand-bound G protein-coupled receptor	0	-
gene8333	sscle_11g081470	SS1G_08032	predicted protein	0	-
gene7905	sscle_10g077280	SS1G_08447	predicted protein	0	-
gene10340	sscle_14g101160	SS1G_08990	predicted protein	0	-
gene10373	sscle_14g101490	SS1G_09036	predicted protein	0	-
gene10676	sscle_15g104510	SS1G_09502	ankyrin repeat protein	0	-
gene11210	sscle_16g109740	SS1G_10391	predicted protein	0	-
gene7274	sscle_09g071070	SS1G_10636	bgh specific protein	0	-
gene7186	sscle_09g070210	SS1G_10746	hypothetical protein SS1G_10746	0	-
gene1407	sscle_02g013700	SS1G_12675	hypothetical protein SS1G_12675	0	-
gene1403	sscle_02g013660	SS1G_12680	predicted protein	0	-
gene10521	sscle_15g102970	SS1G_13479	predicted protein	0	-
gene3529	sscle_04g034520	#N/A
gene4235	sscle_05g041370	#N/A
gene7650	sscle_09g074760	#N/A
